# Supplementary material for: Prevalence and Variation of Developmental Screening and Surveillance in Early Childhood
Source: PubMed Central journal article supplement (PMC6143066; doi:10.1001/jamapediatrics.2018.1524), 2018-07-09
Supplement: jamapediatr-172-857-s001.pdf [file jamapediatr-172-857-s001.pdf]

## Supplementary Online Content

Hirai AH, Kogan MD, Kandasamy V, Reuland C, Bethell C. Prevalence and variation of developmental screening and surveillance in early childhood. *JAMA Pediatr*. Published online July 9, 2018. doi:10.1001/jamapediatrics.2018.1524

**eTable 1.** Adjusted Associations Between Medical Home Components and Developmental Screening and Surveillance

**eTable 2.** Adjusted Associations With Developmental Screening and Surveillance (Without Preventive Medical Visit and Special Health Care Needs Status)

**eTable 3.** Unadjusted and Adjusted Developmental Screening Rates by State

**eTable 4.** Unadjusted and Adjusted Developmental Surveillance Rates by State

This supplementary material has been provided by the authors to give readers additional information about their work.

**eTable 1.** Adjusted Associations Between Medical Home Components and Developmental Screening and Surveillance<sup>a</sup>

| Medical Home Component             | Developmental Screening<br>n=5,129 |            |               | Developmental Surveillance<br>n=5,269 |            |               |
|------------------------------------|------------------------------------|------------|---------------|---------------------------------------|------------|---------------|
|                                    | Adjusted Prevalence                | Rate Ratio | (95% CI)      | Adjusted Prevalence                   | Rate Ratio | (95% CI)      |
| <b>Usual Source of Care</b>        |                                    |            |               |                                       |            |               |
| Yes                                | 33.7                               | 2.14       | (1.55 - 2.96) | 38.4                                  | 1.29       | (0.99 - 1.68) |
| No                                 | 15.7                               | REF        |               | 29.8                                  | REF        |               |
| <b>Personal Doctor or Nurse</b>    |                                    |            |               |                                       |            |               |
| Yes                                | 33.1                               | 1.26       | (1.03 - 1.53) | 39.0                                  | 1.24       | (1.04 - 1.48) |
| No                                 | 26.3                               | REF        |               | 31.4                                  | REF        |               |
| <b>Family-Centered Care</b>        |                                    |            |               |                                       |            |               |
| Yes                                | 33.3                               | 1.62       | (1.18 - 2.24) | 38.5                                  | 1.28       | (0.99 - 1.65) |
| No                                 | 20.5                               | REF        |               | 30.0                                  | REF        |               |
| <b>Referrals if needed</b>         |                                    |            |               |                                       |            |               |
| Yes                                | 37.2                               | 1.08       | (0.73 - 1.60) | 40.7                                  | 0.93       | (0.66 - 1.30) |
| No                                 | 34.3                               | REF        |               | 43.9                                  | REF        |               |
| Not needed                         | 30.2                               | 0.88       | (0.60 - 1.29) | 36.1                                  | 0.82       | (0.60 - 1.13) |
| <b>Care Coordination if needed</b> |                                    |            |               |                                       |            |               |
| Yes                                | 33.2                               | 0.94       | (0.73 - 1.21) | 37.9                                  | 1.07       | (0.86 - 1.33) |
| No                                 | 35.4                               | REF        |               | 35.4                                  | REF        |               |
| Not needed                         | 29.7                               | 0.84       | (0.64 - 1.10) | 37.2                                  | 1.05       | (0.84 - 1.31) |

<sup>a</sup>Adjusted for child age, sex, race/ethnicity, primary household language, family structure, highest household education, household income-to-poverty ratio, insurance coverage and type, preventive visit in past year, child health status, and special health care needs status.

**eTable 2.** Adjusted Associations With Developmental Screening and Surveillance (Without Preventive Medical Visit and Special Health Care Needs Status)<sup>a</sup>

|                                          | Developmental Screening<br>n=5,268 |               |               | Developmental Surveillance<br>n=5,416 |               |               |
|------------------------------------------|------------------------------------|---------------|---------------|---------------------------------------|---------------|---------------|
|                                          | Adjusted<br>Prevalence             | Rate<br>Ratio | (95% CI)      | Adjusted<br>Prevalence                | Rate<br>Ratio | (95% CI)      |
| <b>Predisposing Characteristics</b>      |                                    |               |               |                                       |               |               |
| <b>Age</b>                               |                                    |               |               |                                       |               |               |
| 9-23 months                              | 29.9                               | REF           |               | 36.0                                  | REF           |               |
| 24-35 months                             | 33.0                               | 1.10          | (0.95 - 1.28) | 37.9                                  | 1.05          | (0.93 - 1.20) |
| <b>Sex</b>                               |                                    |               |               |                                       |               |               |
| Male                                     | 32.7                               | REF           |               | 38.4                                  | REF           |               |
| Female                                   | 29.8                               | 0.91          | (0.79 - 1.05) | 35.3                                  | 0.92          | (0.81 - 1.05) |
| <b>Race/Ethnicity</b>                    |                                    |               |               |                                       |               |               |
| Non-Hispanic White                       | 31.0                               | REF           |               | 36.7                                  | REF           |               |
| Non-Hispanic Black                       | 31.1                               | 1.00          | (0.71 - 1.41) | 33.1                                  | 0.90          | (0.68 - 1.20) |
| Hispanic                                 | 31.8                               | 1.02          | (0.81 - 1.30) | 36.8                                  | 1.00          | (0.80 - 1.25) |
| Non-Hispanic Other<br>Single Race        | 25.9                               | 0.84          | (0.59 - 1.19) | 38.1                                  | 1.04          | (0.77 - 1.39) |
| Non-Hispanic Multiple<br>Race            | 36.9                               | 1.19          | (0.93 - 1.53) | 44.1                                  | 1.20          | (0.98 - 1.48) |
| <b>Primary Household Language</b>        |                                    |               |               |                                       |               |               |
| English                                  | 33.0                               | REF           |               | 38.3                                  | REF           |               |
| Non-English                              | 18.4                               | 0.56          | (0.36 - 0.88) | 27.2                                  | 0.71          | (0.49 - 1.03) |
| <b>Family Structure</b>                  |                                    |               |               |                                       |               |               |
| Two Parent, Married                      | 33.2                               | REF           |               | 38.7                                  | REF           |               |
| Two Parent,<br>Unmarried                 | 30.5                               | 0.92          | (0.69 - 1.23) | 36.9                                  | 0.95          | (0.74 - 1.22) |
| Single Mother/Other                      | 24.0                               | 0.72          | (0.54 - 0.97) | 30.1                                  | 0.78          | (0.61 - 0.99) |
| <b>Highest Household Education</b>       |                                    |               |               |                                       |               |               |
| Less than high school                    | 27.8                               | 0.79          | (0.43 - 1.46) | 25.6                                  | 0.65          | (0.35 - 1.18) |
| High school                              | 25.1                               | 0.72          | (0.54 - 0.96) | 31.7                                  | 0.80          | (0.63 - 1.02) |
| Some college                             | 26.6                               | 0.76          | (0.61 - 0.94) | 36.8                                  | 0.93          | (0.78 - 1.11) |
| College degree or<br>higher              | 35.0                               | REF           |               | 39.7                                  | REF           |               |
| <b>Enabling Characteristics</b>          |                                    |               |               |                                       |               |               |
| <b>Household Income-to-Poverty Ratio</b> |                                    |               |               |                                       |               |               |
| <100% Poverty                            | 33.9                               | 1.18          | (0.80 - 1.73) | 37.5                                  | 1.07          | (0.82 - 1.40) |
| 100-199% Poverty                         | 31.2                               | 1.09          | (0.82 - 1.44) | 43.1                                  | 1.23          | (0.98 - 1.53) |
| 200-399% Poverty                         | 32.9                               | 1.14          | (0.95 - 1.38) | 34.3                                  | 0.98          | (0.83 - 1.15) |
| 400%+ Poverty                            | 28.8                               | REF           |               | 35.1                                  | REF           |               |
| <b>Insurance Coverage and Type</b>       |                                    |               |               |                                       |               |               |
| Any Public                               | 30.5                               | 0.95          | (0.75 - 1.20) | 40.0                                  | 1.12          | (0.91 - 1.38) |
| Private only                             | 32.1                               | REF           |               | 35.7                                  | REF           |               |
| Uninsured                                | 23.7                               | 0.74          | (0.42 - 1.28) | 29.8                                  | 0.84          | (0.48 - 1.47) |

|                             | Developmental Screening<br>n=5,268 |               |               | Developmental Surveillance<br>n=5,416 |               |               |
|-----------------------------|------------------------------------|---------------|---------------|---------------------------------------|---------------|---------------|
|                             | Adjusted<br>Prevalence             | Rate<br>Ratio | (95% CI)      | Adjusted<br>Prevalence                | Rate<br>Ratio | (95% CI)      |
| <b>Medical Home</b>         |                                    |               |               |                                       |               |               |
| Has Medical Home            | 35.0                               | 1.33          | (1.13 - 1.57) | 40.1                                  | 1.22          | (1.07 - 1.40) |
| No Medical Home             | 26.3                               | REF           |               | 32.8                                  | REF           |               |
| <b>Need Characteristics</b> |                                    |               |               |                                       |               |               |
| <b>Child Health Status</b>  |                                    |               |               |                                       |               |               |
| Excellent/Very Good         | 31.8                               | REF           |               | 36.4                                  | REF           |               |
| Good/Fair/Poor              | 22.7                               | 0.71          | (0.50 - 1.03) | 45.0                                  | 1.24          | (0.96 - 1.59) |

<sup>a</sup>Preventive visit in past year and special health care needs status are removed from the model out of concern for potential mediation and reverse causality, respectively.

**eTable 3.** Unadjusted and Adjusted Developmental Screening Rates by State

| State | Unadjusted  |                     | Adjusted    |                     |
|-------|-------------|---------------------|-------------|---------------------|
|       | Estimate    | (95% CI)            | Estimate    | (95% CI)            |
| US    | 30.4        | (28.0 -33.0)        | 30.4        | (28.0 -33.0)        |
| AL    | 21.2        | (13.1 -32.3)        | 24.0        | (16.0 -34.5)        |
| AK    | <b>46.8</b> | <b>(35.1 -58.8)</b> | <b>45.7</b> | <b>(34.6 -57.3)</b> |
| AZ    | 30.8        | (18.9 -46.0)        | 32.8        | (19.6 -49.5)        |
| AR    | 20.7        | (12.1 -33.0)        | <b>18.4</b> | <b>(10.8 -29.5)</b> |
| CA    | 22.4        | (12.8 -36.3)        | 26.6        | (16.2 -40.4)        |
| CO    | <b>50.2</b> | <b>(37.8 -62.6)</b> | <b>53.7</b> | <b>(42.0 -64.9)</b> |
| CT    | 28.3        | (18.2 -41.2)        | 27.8        | (18.1 -40.1)        |
| DE    | 26.9        | (18.3 -37.6)        | 23.6        | (15.6 -34.1)        |
| DC    | 29.3        | (20.4 -40.1)        | 31.1        | (21.6 -42.5)        |
| FL    | <b>20.4</b> | <b>(12.8 -30.9)</b> | 22.4        | (14.3 -33.3)        |
| GA    | 37.1        | (24.7 -51.4)        | 39.2        | (27.4 -52.4)        |
| HI    | 32.0        | (22.9 -42.6)        | 31.0        | (22.1 -41.7)        |
| ID    | 24.5        | (15.8 -35.8)        | <b>19.6</b> | <b>(12.6 -29.2)</b> |
| IL    | 39.4        | (28.1 -52.0)        | 39.8        | (28.4 -52.4)        |
| IN    | 28.7        | (19.5 -40.1)        | 31.0        | (20.7 -43.5)        |
| IA    | 34.8        | (25.4 -45.7)        | 32.5        | (22.4 -44.5)        |
| KS    | 41.6        | (30.1 -54.2)        | 40.3        | (28.9 -52.8)        |
| KY    | <b>17.5</b> | <b>(10.6 -27.5)</b> | <b>17.6</b> | <b>(10.6 -27.9)</b> |
| LA    | 21.1        | (12.1 -34.0)        | <b>18.1</b> | <b>(10.2 -30.0)</b> |
| ME    | 31.6        | (21.4 -44.0)        | 33.2        | (21.4 -47.4)        |
| MD    | <b>43.0</b> | <b>(31.4 -55.6)</b> | 39.3        | (28.4 -51.3)        |
| MA    | <b>46.3</b> | <b>(35.2 -57.7)</b> | 41.7        | (30.4 -53.9)        |
| MI    | 26.8        | (18.5 -37.1)        | 26.1        | (18.5 -35.4)        |
| MN    | <b>50.1</b> | <b>(39.5 -60.8)</b> | <b>49.8</b> | <b>(39.9 -59.7)</b> |
| MS    | 17.2        | (6.6 -37.6)         | 20.2        | (7.6 -44.0)         |
| MO    | 23.4        | (15.6 -33.6)        | 22.7        | (15.5 -31.9)        |
| MT    | <b>46.3</b> | <b>(34.7 -58.4)</b> | 39.0        | (28.4 -50.8)        |
| NE    | 33.1        | (24.3 -43.4)        | 31.5        | (22.8 -41.7)        |
| NV    | 30.9        | (18.4 -47.0)        | 27.2        | (16.5 -41.4)        |
| NH    | 32.0        | (21.4 -44.9)        | 32.8        | (21.9 -45.9)        |
| NJ    | 32.9        | (21.6 -46.6)        | 32.2        | (20.5 -46.7)        |
| NM    | 38.4        | (24.1 -54.9)        | 42.6        | (27.3 -59.4)        |
| NY    | <b>17.5</b> | <b>(9.9 -29.1)</b>  | 23.4        | (14.9 -34.8)        |
| NC    | <b>47.6</b> | <b>(34.3 -61.3)</b> | <b>46.8</b> | <b>(33.3 -60.8)</b> |
| ND    | 30.0        | (21.9 -39.6)        | 27.3        | (19.6 -36.7)        |
| OH    | 41.1        | (29.6 -53.6)        | 40.7        | (28.6 -54.1)        |
| OK    | 35.1        | (23.5 -48.8)        | 36.9        | (24.8 -50.9)        |
| OR    | <b>58.8</b> | <b>(46.0 -70.5)</b> | <b>59.8</b> | <b>(47.5 -71.0)</b> |
| PA    | 26.7        | (17.5 -38.6)        | 26.0        | (17.4 -36.9)        |
| RI    | 34.1        | (23.5 -46.6)        | 33.3        | (24.0 -44.2)        |

| State    | Unadjusted |              | Adjusted |              |
|----------|------------|--------------|----------|--------------|
|          | Estimate   | (95% CI)     | Estimate | (95% CI)     |
| SC       | 20.6       | (12.1 -33.0) | 21.4     | (12.5 -34.3) |
| SD       | 40.4       | (30.2 -51.5) | 34.8     | (25.1 -45.9) |
| TN       | 26.2       | (17.0 -38.1) | 26.5     | (17.0 -39.0) |
| TX       | 34.1       | (22.8 -47.5) | 36.4     | (26.5 -47.7) |
| UT       | 33.1       | (24.3 -43.4) | 29.1     | (21.0 -38.9) |
| VT       | 39.7       | (28.2 -52.6) | 35.3     | (24.5 -47.8) |
| VA       | 26.8       | (17.5 -38.7) | 26.5     | (17.2 -38.5) |
| WA       | 31.9       | (21.6 -44.3) | 25.8     | (17.0 -37.0) |
| WV       | 33.2       | (21.1 -48.1) | 32.6     | (20.7 -47.3) |
| WI       | 25.9       | (17.7 -36.2) | 23.5     | (16.4 -32.3) |
| WY       | 27.6       | (18.4 -39.1) | 25.3     | (16.5 -36.8) |
| Variance | 89.2       |              | 85.6     |              |

**Bold** = significantly different from US,  $p < 0.05$

<sup>a</sup>Adjusted for child age, sex, race/ethnicity, primary household language, family structure, highest household education, household income-to-poverty ratio, insurance coverage and type, medical home, preventive visit in past year, child health status, and special health care needs status.

**eTable 4.** Unadjusted and Adjusted Developmental Surveillance Rates by State

| State | Unadjusted  |                     | Adjusted <sup>a</sup> |                     |
|-------|-------------|---------------------|-----------------------|---------------------|
|       | Estimate    | (95% CI)            | Estimate              | (95% CI)            |
| US    | 37.1        | (34.4 -39.8)        | 37.1                  | (34.4 -39.8)        |
| AL    | 29.2        | (18.4 -43.1)        | 31.7                  | (20.2 -46.0)        |
| AK    | <b>53.9</b> | <b>(41.8 -65.5)</b> | <b>54.2</b>           | <b>(41.8 -66.1)</b> |
| AZ    | 36.5        | (23.9 -51.3)        | 36.5                  | (23.4 -52.0)        |
| AR    | 44.2        | (30.9 -58.4)        | 41.1                  | (27.3 -56.5)        |
| CA    | 27.9        | (16.8 -42.5)        | <b>25.8</b>           | <b>(16.2 -38.4)</b> |
| CO    | 44.8        | (33.0 -57.2)        | 46.8                  | (32.8 -61.3)        |
| CT    | 47.7        | (35.0 -60.6)        | 48.3                  | (35.7 -61.2)        |
| DE    | 40.4        | (28.8 -53.2)        | 39.4                  | (27.7 -52.5)        |
| DC    | 37.3        | (27.3 -48.4)        | 39.3                  | (29.3 -50.2)        |
| FL    | 37.0        | (25.1 -50.6)        | 36.6                  | (25.9 -48.8)        |
| GA    | 33.7        | (21.8 -48.2)        | 34.6                  | (22.6 -49.0)        |
| HI    | 36.7        | (27.1 -47.5)        | 36.5                  | (26.3 -48.0)        |
| ID    | <b>49.8</b> | <b>(38.9 -60.8)</b> | 43.2                  | (33.2 -53.8)        |
| IL    | 42.2        | (31.0 -54.2)        | 43.8                  | (33.1 -55.0)        |
| IN    | 32.5        | (22.4 -44.5)        | 31.4                  | (21.6 -43.2)        |
| IA    | <b>59.4</b> | <b>(48.6 -69.4)</b> | <b>55.5</b>           | <b>(44.9 -65.7)</b> |
| KS    | 31.5        | (22.1 -42.6)        | 32.3                  | (23.2 -43.0)        |
| KY    | 28.8        | (19.0 -41.2)        | 29.9                  | (19.3 -43.1)        |
| LA    | 31.2        | (19.0 -46.6)        | 25.4                  | (15.3 -39.0)        |
| ME    | 41.5        | (30.0 -53.9)        | 39.8                  | (27.8 -53.1)        |
| MD    | 47.3        | (35.1 -59.8)        | 43.3                  | (31.3 -56.1)        |
| MA    | <b>54.9</b> | <b>(43.5 -65.9)</b> | 48.3                  | (37.1 -59.7)        |
| MI    | 34.1        | (24.3 -45.5)        | 36.1                  | (26.4 -47.2)        |
| MN    | 45.8        | (35.4 -56.6)        | 47.0                  | (36.6 -57.7)        |
| MS    | <b>19.1</b> | <b>(9.0 -36.0)</b>  | <b>21.0</b>           | <b>(9.8 -39.5)</b>  |
| MO    | 38.1        | (26.8 -50.8)        | 38.3                  | (26.8 -51.2)        |
| MT    | 42.1        | (31.2 -53.9)        | 37.5                  | (27.3 -48.9)        |
| NE    | 32.8        | (23.9 -43.1)        | 32.7                  | (23.7 -43.2)        |
| NV    | 33.4        | (22.7 -46.2)        | 35.6                  | (24.0 -49.2)        |
| NH    | 30.6        | (21.4 -41.6)        | 30.1                  | (21.1 -40.8)        |
| NJ    | 26.7        | (16.8 -39.7)        | 26.9                  | (17.5 -39.0)        |
| NM    | 36.8        | (23.6 -52.4)        | 30.6                  | (17.9 -47.1)        |
| NY    | 32.5        | (21.4 -45.9)        | 39.2                  | (25.6 -54.7)        |
| NC    | 49.5        | (36.3 -62.9)        | 47.2                  | (34.4 -60.3)        |
| ND    | 40.4        | (31.5 -50.0)        | 38.4                  | (29.5 -48.1)        |
| OH    | 40.3        | (29.0 -52.7)        | 38.2                  | (26.5 -51.4)        |
| OK    | 30.6        | (20.5 -43.1)        | 30.4                  | (20.3 -42.9)        |
| OR    | <b>60.8</b> | <b>(49.0 -71.5)</b> | <b>61.1</b>           | <b>(49.4 -71.7)</b> |
| PA    | 36.6        | (25.8 -49.0)        | 37.2                  | (27.0 -48.7)        |
| RI    | 42.6        | (31.1 -55.0)        | 40.0                  | (28.7 -52.4)        |

| State    | Unadjusted |              | Adjusted <sup>a</sup> |              |
|----------|------------|--------------|-----------------------|--------------|
|          | Estimate   | (95% CI)     | Estimate              | (95% CI)     |
| SC       | 41.7       | (29.2 -55.3) | 41.1                  | (29.1 -54.3) |
| SD       | 44.4       | (34.4 -54.9) | 42.5                  | (32.2 -53.4) |
| TN       | 42.5       | (30.9 -55.0) | 41.1                  | (29.6 -53.5) |
| TX       | 30.9       | (19.9 -44.6) | 31.4                  | (21.7 -43.1) |
| UT       | 47.3       | (37.3 -57.5) | 45.9                  | (35.9 -56.3) |
| VT       | 39.4       | (27.9 -52.2) | 33.9                  | (23.3 -46.5) |
| VA       | 43.3       | (32.2 -55.1) | 38.8                  | (28.4 -50.3) |
| WA       | 47.1       | (35.0 -59.5) | 42.9                  | (31.1 -55.6) |
| WV       | 48.5       | (34.8 -62.5) | 51.2                  | (37.2 -65.0) |
| WI       | 39.0       | (28.8 -50.2) | 37.5                  | (27.8 -48.4) |
| WY       | 41.8       | (30.3 -54.4) | 38.9                  | (27.0 -52.3) |
| Variance | 70.5       |              | 61.5                  |              |

**Bold** = significantly different from US, p<0.05

<sup>a</sup>Adjusted for child age, sex, race/ethnicity, primary household language, family structure, highest household education, household income-to-poverty ratio, insurance coverage and type, medical home, preventive visit in past year, child health status, and special health care needs status.
